# Supplementary material for: Comparative phylogeography of five bumblebees: impact of range fragmentation, range size and diet specialization
Source: Oxford University Press journal article supplement (doi:10.1111/bij.12636), 2015-08-21
Supplement: bij12636-sup-0002-TableS1.pdf [file bij12636-sup-0002-TableS1.pdf]

**Table S1a.** Sampling localities for the *Megabombus* species (*B. consobrinus*, *B. gerstaeckeri* and *B. hortorum*) and distribution of haplotypes for three loci. (S) and (G) refer to a specialist or generalist species (or group of sampled populations in the case of *B. consobrinus*). The number of analysed individuals is indicated beside each number of haplotypes (“m” refers to male individuals and “f” to female individuals). (\*) refers to phased haplotypes associated to a low reconstruction probability ( $p < 0.9$ ).

| Population Locality               | Geographical coordinates | n (COI)     | Haplotypes (no. of copies) COI | n (EF-1 $\alpha$ ) | Haplotypes (no. of copies) EF-1 $\alpha$ | n (PEPCK)   | Haplotypes (no. of copies) PEPCK |
|-----------------------------------|--------------------------|-------------|--------------------------------|--------------------|------------------------------------------|-------------|----------------------------------|
| <b><i>B. consobrinus</i> (S)</b>  |                          |             |                                |                    |                                          |             |                                  |
| Fjällnäs (Sweden)                 | 62.60°N, 12.18°E         | 4 (4m)      | 30(2), 31, 35                  | 4 (4m)             | 11(3) 19                                 | 4 (4m)      | 9(3), 15                         |
| Skärkdalen (Sweden)               | 62.82°N, 12.81°E         | 1 (1m)      | 30                             | 1 (1m)             | 11                                       | 1 (1m)      | 9                                |
| Skärvången (Sweden)               | 63.77°N, 14.33°E         | 1 (1m)      | 27                             | 1 (1m)             | 21                                       | 1 (1m)      | 9                                |
| Rørros (Norway)                   | 62.65°N, 11.86°E         | 9 (9m)      | 30(8), 32                      | 9 (9m)             | 11(6), 15, 19, 21                        | 8 (8m)      | 9(4), 15(4)                      |
| Nikitskaija (Russia)              | 60.57°N, 40.29°E         | 1 (1m)      | 28                             | 1 (1m)             | 18                                       | 1 (1m)      | 9                                |
| Abramtsevo (Russia)               | 50.82°N, 37.82°E         | 1 (1m)      | 33                             | 1 (1m)             | 19                                       | 1 (1m)      | 15                               |
| Naro-Fominsk (Russia)             | 55.38°N, 36.76°E         | 2 (1f)      | 34                             | 2 (1f)             | 11*, 13*                                 | 2 (1f)      | 9, 15                            |
| Mondy (Russia)                    | 51.66°N, 101.16°E        | 14 (14m)    | 23(2), 24(6), 25, 27(5)        | 14 (14m)           | 11(3), 12(2), 15(2), 17, 18(4), 19(2)    | 10 (10m)    | 9(2), 10, 15(6), 16              |
| Novosibirsk (Russia)              | 54.83°N, 83.12°E         | 4 (4f)      | 24(4)                          | 2 (1f)             | 11(2)                                    | -           | -                                |
| <b><i>B. consobrinus</i> (G)</b>  |                          |             |                                |                    |                                          |             |                                  |
| Yuzhny Sakhalin (Russia)          | 49.95°N, 124.78°E        | 6 (6m)      | 26, 29(5)                      | 1 (1m)             | 11                                       | -           | -                                |
| Anisimovka (Russia)               | 43.17°N, 132.77°E        | 14 (5m, 9f) | 38(11), 39(2), 40              | 17 (5m, 6f)        | 10, 11(3), 12(4), 14, 15, 16, 18(5), 20  | 10 (3m, 3f) | 9(4), 12, 13(2), 15(2), 17       |
| Kamenushka (Russia)               | 43.64°N, 132.20°E        | 8 (8f)      | 38(8)                          | 8 (4f)             | 11, 12(4), 18(3)                         | 8 (4f)      | 9(2), 10(3), 15*, 17, 18*        |
| Nodong Valley (South Korea)       | 37.70°N, 128.48°E        | 15 (7m, 8f) | 36(4), 37, 38(8), 41(2)        | 17 (7m, 5f)        | 11(3), 14, 15, 16, 18(11)                | 19 (7m, 6f) | 9(8), 10, 11, 14(2), 17(7)       |
| <b><i>B. gerstaeckeri</i> (S)</b> |                          |             |                                |                    |                                          |             |                                  |
| Gavarnie (France)                 | 42.70°N, 0.02°W          | 10 (6m, 4f) | 14(1), 17(9)                   | 12 (6m, 3f)        | 5(12)                                    | 12 (6m, 3f) | 1(12)                            |
| Gèdre (France)                    | 42.73°N, 0.05°E          | 1 (1f)      | 17                             | 2 (1f)             | 5(2)                                     | 2 (1f)      | 1(2)                             |
| Lac de l'Oule (France)            | 42.83°N, 0.20°E          | 1 (1f)      | 14                             | 2 (1f)             | 5(2)                                     | -           | -                                |
| Eyne (France)                     | 42.46°N, 2.10°E          | 5 (4m, 1f)  | 14(2), 17(3)                   | 6 (4m, 1f)         | 5(6)                                     | 2 (2m)      | 1(2)                             |
| Forêt d'Egat (France)             | 42.51°N, 2.02°E          | 10 (3m, 7f) | 14(6), 17(2), 18(2)            | 11 (3m, 4f)        | 5(11)                                    | 11 (3m, 4f) | 1(11)                            |
| Saint-Véran (France)              | 44.70°N, 5.86°E          | 8 (2m, 6f)  | 14(8)                          | 6 (2m, 2f)         | 2, 4(3), 5(2)                            | 10 (2m, 4f) | 1(10)                            |
| Kandersteg (Switzerland)          | 46.49°N, 7.67°E          | 7 (7m)      | 11, 14(6)                      | 5 (5m)             | 4(3), 5(2)                               | 5 (5m)      | 1(5)                             |
| Vals (Switzerland)                | 46.62°N, 9.19°E          | 7 (7m)      | 14(6), 15                      | 3 (3m)             | 3, 4(2)                                  | 4 (4m)      | 1(4)                             |
| Gramais (Austria)                 | 47.27°N, 10.54°E         | 9 (9f)      | 10, 14(8)                      | 10 (5f)            | 4(5), 5(5)                               | 10 (5f)     | 1(10)                            |
| Bohinjsko Jezero (Slovenia)       | 46.28°N, 13.78°E         | 8 (8f)      | 12, 13, 14(5), 16              | 10 (5f)            | 4(8), 5(2)                               | 6 (3f)      | 1(6)                             |
| Carpates (Ukraine)                | 48.15°N, 24.55°E         | 5 (3m, 2f)  | 14(5)                          | 5 (3m, 1f)         | 4(5)                                     | 3 (3m)      | 1(3)                             |
| <b><i>B. hortorum</i> (G)</b>     |                          |             |                                |                    |                                          |             |                                  |
| Uppsala (Sweden)                  | 59.85°N, 17.63°E         | 3 (3m)      | 2, 5(2)                        | 1 (1m)             | 1                                        | 1 (1m)      | 4                                |
| Jämtland (Sweden)                 | 62.81°N, 13.61°E         | 2 (2m)      | 5(2)                           | 1 (1m)             | 1                                        | 1 (1m)      | 4                                |
| Lund (Sweden)                     | 55.65°N, 13.50°E         | 1 (1m)      | 5                              | 1 (1m)             | 1                                        | 1 (1m)      | 4                                |
| Alness (England)                  | 57.77°N, 4.25°W          | 2 (2m)      | 5(2)                           | 1 (1m)             | 1                                        | 1 (1m)      | 4                                |
| Berismenil (Belgium)              | 50.18°N, 5.64°E          | 3 (3m)      | 5(2), 8                        | 1 (1m)             | 1                                        | 1 (1m)      | 4                                |
| Nord-Pas-de-Calais (France)       | 50.93°N, 1.71°E          | 1 (1m)      | 5                              | 1 (1m)             | 1                                        | 1 (1m)      | 4                                |
| Saint-Véran (France)              | 44.70°N, 6.86°E          | 1 (1f)      | 4                              | 2 (1f)             | 1(2)                                     | 2 (1f)      | 3, 4                             |
| Forêt d'Egat (France)             | 42.51°N, 2.02°E          | 5 (5m)      | 5(4), 6                        | 3 (3m)             | 1(3)                                     | 3 (3m)      | 4(3)                             |
| Gavarnie (France)                 | 42.71°N, 0.01°W          | 5 (5m)      | 5(5)                           | 3 (3m)             | 1(3)                                     | 3 (3m)      | 3, 4(2)                          |
| Reutte (Austria)                  | 47.50°N, 10.74°E         | 2 (2m)      | 5(2)                           | 1 (1m)             | 1                                        | 1 (1m)      | 4                                |
| Lovech (Bulgaria)                 | 42.78°N, 24.61°E         | 1 (1m)      | 5                              | 1 (1m)             | 1                                        | -           | -                                |
| Prague (Czech Republic)           | 50.11°N, 14.42°E         | 1 (1m)      | 5                              | 1 (1m)             | 1                                        | 1 (1m)      | 4                                |
| Kolin (Czech Republic)            | 50.06°N, 15.21°E         | 2 (2m)      | 5, 7                           | 1 (1m)             | 1                                        | 1 (1m)      | 4                                |
| Negruzzo (Italia)                 | 44.72°N, 9.21°E          | 3 (3m)      | 5(3)                           | 2 (2m)             | 1(2)                                     | 1 (1m)      | 3                                |
| Biesland (Holland)                | 50.83°N, 5.69°E          | 1 (1m)      | 5                              | 1 (1m)             | 1                                        | 1 (1m)      | 4                                |
| Rørros (Norway)                   | 62.66°N, 11.53°E         | 5 (5m)      | 1, 5(4)                        | 5 (5m)             | 1(5)                                     | 5 (5m)      | 4(5)                             |
| Stary Gieląd (Poland)             | 53.86°N, 21.14°E         | 1 (1m)      | 8                              | 1 (1m)             | 1                                        | 1 (1m)      | 4                                |
| Mazurki (Poland)                  | 53.87°N, 22.90°E         | 2 (2m)      | 5(2)                           | 1 (1m)             | 1                                        | 1 (1m)      | 3                                |
| Radoszyce (Poland)                | 51.07°N, 20.27°E         | 1 (1m)      | 5                              | 1 (1m)             | 1                                        | 1 (1m)      | 4                                |
| Kranjska Gora (Slovenia)          | 46.44°N, 13.75°E         | 1 (1m)      | 5                              | 1 (1m)             | 1                                        | 1 (1m)      | 4                                |
| Radovljica (Slovenia)             | 46.37°N, 14.16°E         | 3 (3m)      | 5(3)                           | 3 (3m)             | 1(3)                                     | 3 (3m)      | 4(3)                             |
| Nesvady (Slovakia)                | 47.96°N, 18.10°E         | 1 (1m)      | 5                              | 1 (1m)             | 1                                        | 1 (1m)      | 4                                |
| Kamenica nad Hronom (Slovakia)    | 47.83°N, 18.73°E         | 1 (1m)      | 5                              | 1 (1m)             | 1                                        | 1 (1m)      | 4                                |
| Mykulychyn (Ukraine)              | 48.42°N, 24.61°E         | 5 (5m)      | 3, 5(4)                        | 5 (5m)             | 1(5)                                     | 4 (4m)      | 4(4)                             |
| Milliparki (Turkey)               | 40.93°N, 41.14°E         | 5 (5m)      | 9(5)                           | 5 (5m)             | 1(5)                                     | 4 (4m)      | 4(4)                             |

**Table S1b.** Sampling localities for the *Pyrobombus* species (*B. brodmannicus* and *B. pratorum*) and distribution of haplotypes for three loci. (S) and (G) refer to a specialist or generalist species (or group of sampled populations in the case of *B. brodmannicus*). The number of analysed individuals is indicated beside each number of haplotypes (“m” refers to male individuals and “f” to female individuals). (\*) refers to phased haplotypes associated to a low reconstruction probability ( $p < 0.9$ ).

| Population Locality               | Geographical coordinates | n (COI)    | Haplotypes (no. of copies) COI | n (EF-1 $\alpha$ ) | Haplotypes (no. of copies) EF-1 $\alpha$ | n (PEPCK)  | Haplotypes (no. of copies) PEPCK |
|-----------------------------------|--------------------------|------------|--------------------------------|--------------------|------------------------------------------|------------|----------------------------------|
| <b><i>B. brodmannicus</i> (S)</b> |                          |            |                                |                    |                                          |            |                                  |
| Saint-Paul sur Ubaye (France)     | 44.59°N, 6.83°E          | 3 (1m, 2f) | 14(2), 15                      | 5 (1m, 2f)         | 11(5)                                    | 5 (1m, 2f) | 45(5)                            |
| Le Roux (France)                  | 44.84°N, 6.95°E          | 6 (6f)     | 11, 14(5)                      | 8 (4f)             | 11(8)                                    | 12 (6f)    | 45(12)                           |
| Sainte-Catherine (France)         | 44.60°N, 6.70°E          | 4 (4f)     | 11(4)                          | 6 (3f)             | 11(6)                                    | 2 (1f)     | 45(2)                            |
| Col d'Allos (France)              | 44.30°N, 6.58°E          | 3 (3f)     | 14(3)                          | 4 (2f)             | 11(4)                                    | 6 (3f)     | 45(6)                            |
| Col de la Cayolle (France)        | 44.25°N, 6.75°E          | 3 (3f)     | 14(3)                          | 4 (2f)             | 11(4)                                    | 6 (3f)     | 45(6)                            |
| <b><i>B. brodmannicus</i> (G)</b> |                          |            |                                |                    |                                          |            |                                  |
| Erzurum (Turkey)                  | 40.35°N, 41.70°E         | 18 (18m)   | 12(12), 13(6)                  | 18 (18m)           | 10, 11(13), 12(2), 13(2)                 | 14 (14m)   | 45(10), 46(3), 47                |
| <b><i>B. pratorum</i> (G)</b>     |                          |            |                                |                    |                                          |            |                                  |
| Luxembourg (Belgium)              | 50.25°N, 5.78°E          | 4 (4m)     | 1(4)                           | 4 (4m)             | 6(3), 7                                  | 4 (4m)     | 20, 35, 38(2)                    |
| Hainaut (Belgium)                 | 50.44°N, 3.87°E          | 2 (2m)     | 6(2)                           | 2 (2m)             | 2(2)                                     | 2 (2m)     | 17, 20                           |
| Eindhoven (Holland)               | 51.47°N, 5.39°E          | 1 (1m)     | 6                              | 1 (1m)             | 6                                        | 1 (1m)     | 30                               |
| Nunspeet (Holland)                | 52.33°N, 5.77°E          | 1 (1m)     | 6                              | 1 (1m)             | 6                                        | 1 (1m)     | 36                               |
| Nord-Pas-de-Calais (France)       | 50.90°N, 1.69°E          | 1 (1m)     | 6                              | 1 (1m)             | 2                                        | 1 (1m)     | 37                               |
| Bouchouse (France)                | 44.74°N, 6.99°E          | 1 (1m)     | 6                              | 1 (1m)             | 2                                        | 1 (1m)     | 5                                |
| Le Roux (France)                  | 44.84°N, 6.94°E          | 1 (1m)     | 6                              | 1 (1m)             | 1                                        | 1 (1m)     | 35                               |
| Eyne (France)                     | 42.42°N, 2.05°E          | 2 (2m)     | 6, 7                           | 2 (2m)             | 1(2)                                     | 2 (2m)     | 23, 31                           |
| Nohèdes (France)                  | 42.63°N, 2.26°E          | 4 (4m)     | 6, 7(3)                        | 2 (2m)             | 1, 2                                     | 3 (3m)     | 15, 28, 43                       |
| Saint-Véran (France)              | 44.70°N, 6.86°E          | 4 (4m)     | 1(2), 6(2)                     | 4 (4m)             | 1, 2(2), 6                               | 4 (4m)     | 3, 20, 23(2)                     |
| Forêt d'Egat (France)             | 42.51°N, 2.02°E          | 1 (1m)     | 6                              | -                  | -                                        | -          | -                                |
| Saint-Paul sur Ubaye (France)     | 44.56°N, 6.81°E          | 2 (1m, 1f) | 6(2)                           | 3 (1m, 1f)         | 1, 6(2)                                  | 3 (1m, 1f) | 5, 14*, 16*                      |
| Col d'Allos (France)              | 44.29°N, 5.57°E          | 2 (2m)     | 6(2)                           | 2 (2m)             | 6(2)                                     | 2 (2m)     | 40(2)                            |
| Colmar (France)                   | 48.07°N, 7.37°E          | 2 (2m)     | 6(2)                           | 2 (2m)             | 2, 4                                     | 2 (2m)     | 5, 23                            |
| Angers (France)                   | 47.50°N, 0.50°W          | 1 (1m)     | 6                              | 1 (1m)             | 7                                        | 1 (1m)     | 40                               |
| Seine Maritime (France)           | 49.50°N, 0.07°E          | 1 (1m)     | 6                              | -                  | -                                        | -          | -                                |
| Essonne (France)                  | 48.50°N, 2.33°E          | 1 (1m)     | 6                              | 1 (1m)             | 2                                        | -          | -                                |
| Aveyron (France)                  | 44.53°N, 2.94°E          | 2 (2m)     | 6(2)                           | -                  | -                                        | -          | -                                |
| Ille et Vilaine (France)          | 48.51°N, 1.62°E          | 1 (1m)     | 6                              | -                  | -                                        | -          | -                                |
| Frossay (France)                  | 47.24°N, 1.94°W          | 1 (1m)     | 6                              | -                  | -                                        | -          | -                                |
| Saint-Père-en-Retz (France)       | 47.21°N, 2.04°W          | 1 (1m)     | 6                              | -                  | -                                        | -          | -                                |
| Le Pellerier (France)             | 49.04°N, 0.88°W          | 1 (1m)     | 6                              | -                  | -                                        | -          | -                                |
| Pornic (France)                   | 47.12°N, 2.10°W          | 1 (1m)     | 6                              | 1 (1m)             | 4                                        | 1 (1m)     | 23                               |
| Plougastel (France)               | 48.37°N, 4.37°W          | 1 (1m)     | 6                              | 1 (1m)             | 2                                        | -          | -                                |
| Fontaine-le-Port (France)         | 48.49°N, 2.76°E          | 1 (1m)     | 6                              | 1 (1m)             | 6                                        | 1 (1m)     | 10                               |
| Dettenheim (Germany)              | 49.15°N, 8.40°E          | 1 (1m)     | 6                              | 1 (1m)             | 6                                        | 1 (1m)     | 20                               |
| Lauffen (Germany)                 | 49.09°N, 9.17°E          | 1 (1m)     | 6                              | 1 (1m)             | 6                                        | 1 (1m)     | 32                               |
| Sjælland (Denmark)                | 54.97°N, 12.02°E         | 1 (1m)     | 1                              | 1 (1m)             | 2                                        | 1 (1m)     | 21                               |
| Dallarna (Sweden)                 | 61.39°N, 13.30°E         | 2 (2m)     | 1(2)                           | 2 (2m)             | 2, 6                                     | 2 (2m)     | 19(2)                            |
| Jämtland (Sweden)                 | 62.81°N, 13.61°E         | 2 (2m)     | 2(2)                           | 2 (2m)             | 1(2)                                     | 2 (2m)     | 7, 12                            |
| Inari (Finland)                   | 68.49°N, 26.09°E         | 1 (1m)     | 6                              | -                  | -                                        | -          | -                                |
| Kittilä (Finland)                 | 67.75°N, 25.23°E         | 1 (1m)     | 6                              | -                  | -                                        | -          | -                                |
| Røros (Norway)                    | 62.64°N, 11.57°E         | 1 (1m)     | 3                              | 1 (1m)             | 1                                        | 1 (1m)     | 20                               |
| Botn-Vatnet (Norway)              | 70.66°N, 29.20°E         | 3 (3m)     | 3(3)                           | -                  | -                                        | -          | -                                |
| Oppland (Norway)                  | 60.58°N, 10.33°E         | 7 (7m)     | 3(6), 6                        | 6 (6m)             | 1(3), 6(3)                               | 1 (1m)     | 26                               |
| Rogaland (Norway)                 | 59.37°N, 5.98°E          | 3 (3m)     | 3(3)                           | 4 (4m)             | 2(2), 6(2)                               | 2 (2m)     | 9, 14                            |
| Hordaland (Norway)                | 59.81°N, 6.81°E          | 1 (1m)     | 3                              | 1 (1m)             | 2                                        | -          | -                                |
| Oslo (Norway)                     | 59.99°N, 10.67°E         | 1 (1m)     | 6                              | 1 (1m)             | 2                                        | 1 (1m)     | 34                               |
| Larvik (Norway)                   | 59.02°N, 9.84°E          | 1 (1m)     | 3                              | 1 (1m)             | 6                                        | 1 (1m)     | 14                               |
| Wick (England)                    | 58.47°N, 3.23°W          | 2 (2m)     | 1(2)                           | 2 (2m)             | 2, 6                                     | 2 (2m)     | 6, 11                            |
| Winnersh (England)                | 51.43°N, 0.88°W          | 2 (2m)     | 6(2)                           | 2 (2m)             | 2, 6                                     | 2 (2m)     | 1, 32                            |
| Milliparki (Turkey)               | 40.92°N, 41.15°E         | 4 (4m)     | 4(4)                           | 5 (5m)             | 2(5)                                     | 3 (3m)     | 39, 43, 44                       |
| Damar (Turkey)                    | 41.15°N, 41.53°E         | 5 (5m)     | 4(5)                           | 4 (4m)             | 2(3), 3                                  | 4 (4m)     | 42(3), 43                        |
| Dehetná (Czech Republic)          | 49.63°N, 12.76°E         | 1 (1f)     | 6                              | 2 (1f)             | 1(2)                                     | 2 (1f)     | 11*, 35*                         |
| Vstavacova (Czech Republic)       | 50.05°N, 14.30°E         | 1 (1f)     | 5                              | 2 (1f)             | 6(2)                                     | 2 (1f)     | 23, 24                           |
| Modrava (Czech Republic)          | 49.02°N, 13.50°E         | 1 (1m)     | 6                              | 2 (2m)             | 2, 6                                     | 2 (2m)     | 8, 20                            |
| Horní Alberice (Czech Republic)   | 50.69°N, 15.85°E         | 1 (1m)     | 3                              | 1 (1m)             | 2                                        | -          | -                                |
| Carpates (Romania)                | 45.45°N, 24.62°E         | 6 (6m)     | 6, 7(5)                        | 5 (5m)             | 1, 2(3), 6                               | 5 (5m)     | 4, 7(2), 14, 25                  |
| Bohinjsko Jezero (Slovenia)       | 46.28°N, 13.78°E         | 3 (3m)     | 6(2), 7                        | 3 (3m)             | 2, 4, 6                                  | 2 (2m)     | 23, 31                           |
| Iglenik (Slovenia)                | 45.74°N, 15.25°E         | 1 (1m)     | 7                              | -                  | -                                        | -          | -                                |
| Planina (Slovenia)                | 45.82°N, 14.24°E         | 1 (1m)     | 7                              | -                  | -                                        | -          | -                                |
| Rogla (Slovenia)                  | 46.45°N, 15.33°E         | 1 (1m)     | 6                              | -                  | -                                        | -          | -                                |
| Terruel (Spain)                   | 40.24°N, 0.64°W          | 3 (3m)     | 6(3)                           | 3 (3m)             | 1(2), 2                                  | 3 (3m)     | 10, 15, 23                       |
| Segovia (Spain)                   | 41.25°N, 3.45°W          | 3 (3m)     | 6(3)                           | 2 (2m)             | 1, 6                                     | 3 (3m)     | 10, 11, 28                       |
| Vals (Switzerland)                | 46.62°N, 9.19°E          | 1 (1m)     | 6                              | 1 (1m)             | 2                                        | 1 (1m)     | 36                               |
| Popdatranská Kotlina (Slovakia)   | 49.17°N, 20.28°E         | 5 (5m)     | 6, 7(4)                        | 3 (3m)             | 2, 4, 5                                  | 4 (4m)     | 13, 23(2), 27                    |
| Serebryanye Prudy (Russia)        | 54.50°N, 38.51°E         | 1 (1m)     | 6                              | 2 (2m)             | 1, 2                                     | 2 (2m)     | 2, 36                            |
| Taldom (Russia)                   | 56.47°N, 37.65°E         | 2 (2m)     | 6(2)                           | 2 (2m)             | 6(2)                                     | 2 (2m)     | 18, 41                           |
| Rakhiv (Ukraine)                  | 48.15°N, 24.55°E         | 2 (2m)     | 6, 7                           | 3 (3m)             | 1(2), 2                                  | 4 (4m)     | 7, 14, 23, 35                    |
